# Supplementary material
Source: Springer Nature journal article supplement (https://www.springermedizin.de/resource/supplementary/12877_2009_303_MOESM2_ESM.pdf/9439344)
Supplement: MOESM2 [file 9439344]

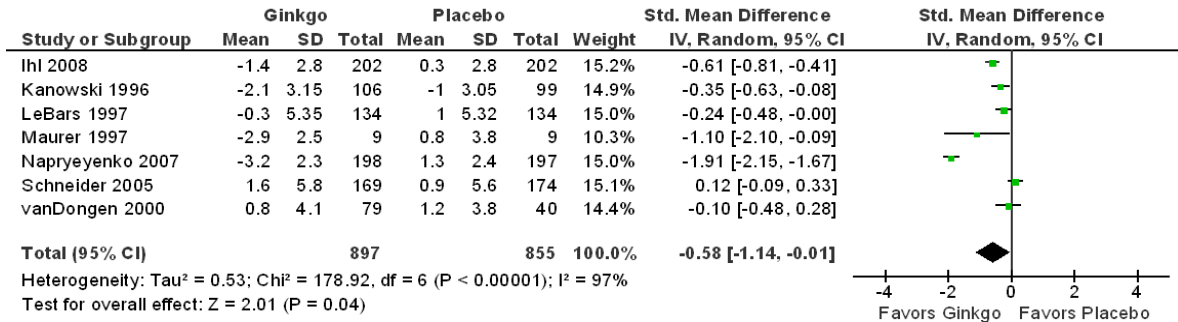

**ADAS-cog=Alzheimer's disease Assessment Scale cognitive subscale; ITT=intent-to-treat; LOCF=last observation carried forward; SD=standard deviation; SKT=Syndrom Kurz-Test; 95% CI=95% confidence interval.**
